# Supplementary material for: Patient-specific modeling of stroma-mediated chemoresistance of pancreatic cancer using a three-dimensional organoid-fibroblast co-culture system
Source: PubMed Central journal article supplement (PMC9588250; doi:10.1186/s13046-022-02519-7), 2022-10-22
Supplement: 13046_2022_2519_MOESM1_ESM.pdf [file 13046_2022_2519_MOESM1_ESM.pdf]

# Supplementary Figures

## Supplementary Figure S1

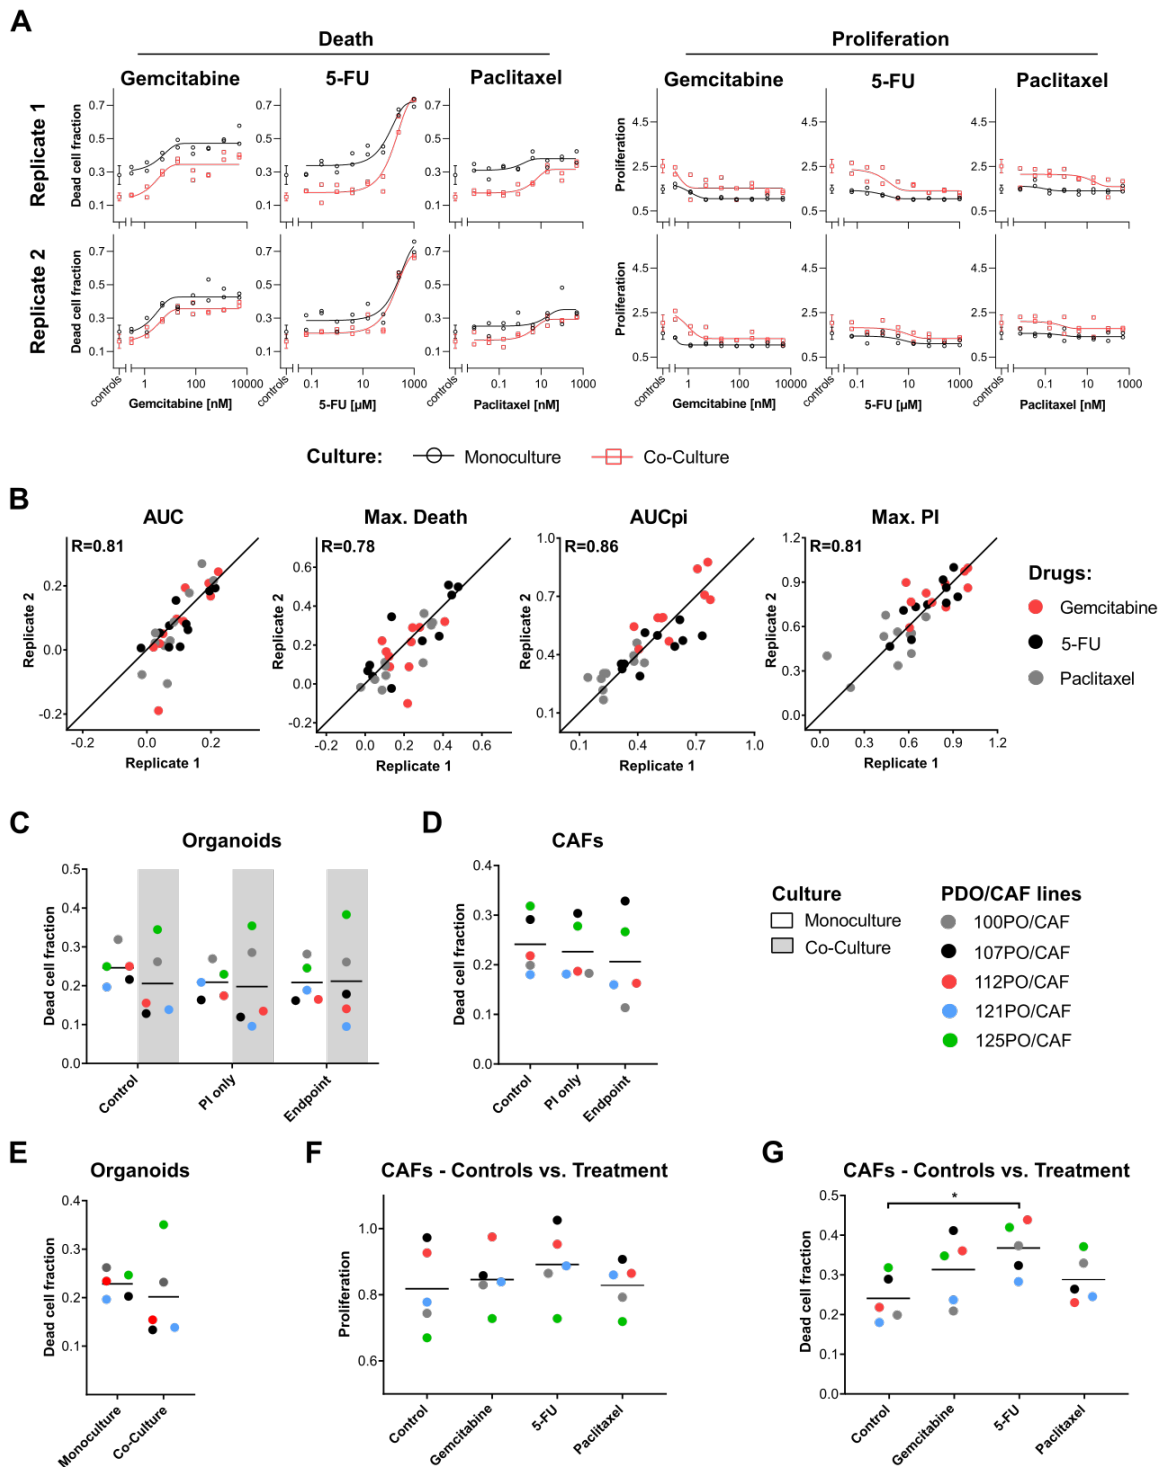

Supplementary Figure S1. A) Example of the dose response curves generated after drug testing for 112PO in mono- and co-culture settings. B) Pearson correlation of the assessed assay parameters

between independent replicates. **C)** Hoechst and propidium iodide (PI) staining had no cytotoxic effect on PDAC organoids. Control samples (stained with Hoechst + PI on day 3 and day 8) were compared with only PI-stained (day 3: PI, day 8: Hoechst + PI) or endpoint-stained samples (day 3: no staining, day 8: Hoechst + PI). **D)** Hoechst and propidium iodide (PI) staining had no cytotoxic effect on CAFs. Control samples (stained with Hoechst + PI on day 3 and day 8) were compared with only PI-stained samples (day 3: PI, day 8: Hoechst + PI) or endpoint-stained (day 3: no staining, day 8: Hoechst + PI). **E)** Cell death of untreated PDAC organoids (controls) after 8 days in culture. **F-G)** Effect of gemcitabine, 5-FU and paclitaxel on proliferation (**F**) and cell death (**G**) of CAFs in co-culture with PDOs. Dunnett's test, \*  $P < 0.05$ .

## Supplementary Figure S2

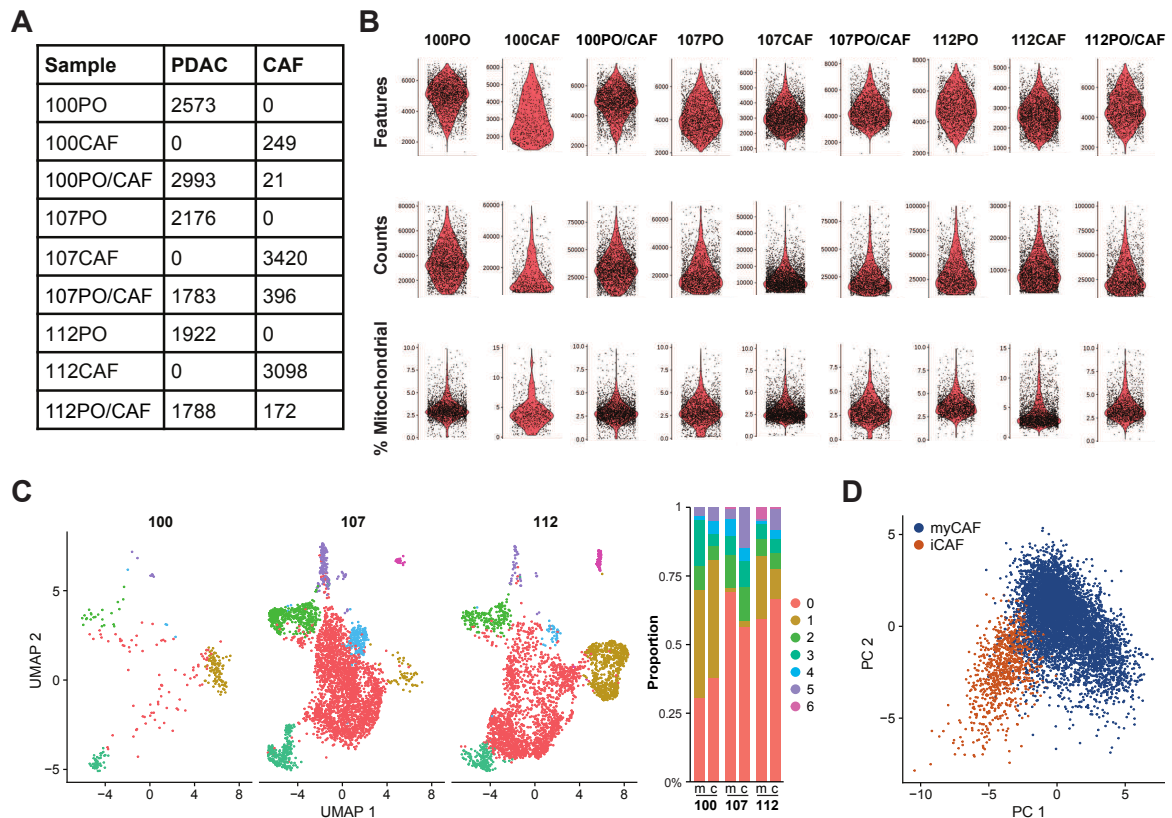

**Supplementary Figure S2.** **A)** Number of PDO and CAF cells identified in each sample. **B)** Number of features (genes), number of RNA counts, and percentage of mitochondrial counts identified in each sample. **C)** Left: Distribution of CAF cells among clusters, shown as UMAP split by patient origin. Right: Bar plot showing CAF cluster proportions split by patient origin and sample type (m: monoculture, c: co-culture). **D)** PCA projection of CAF cells from mono- and co-culture samples, with PCA computed on iCAF and myCAF marker genes.

### Supplementary Figure S3

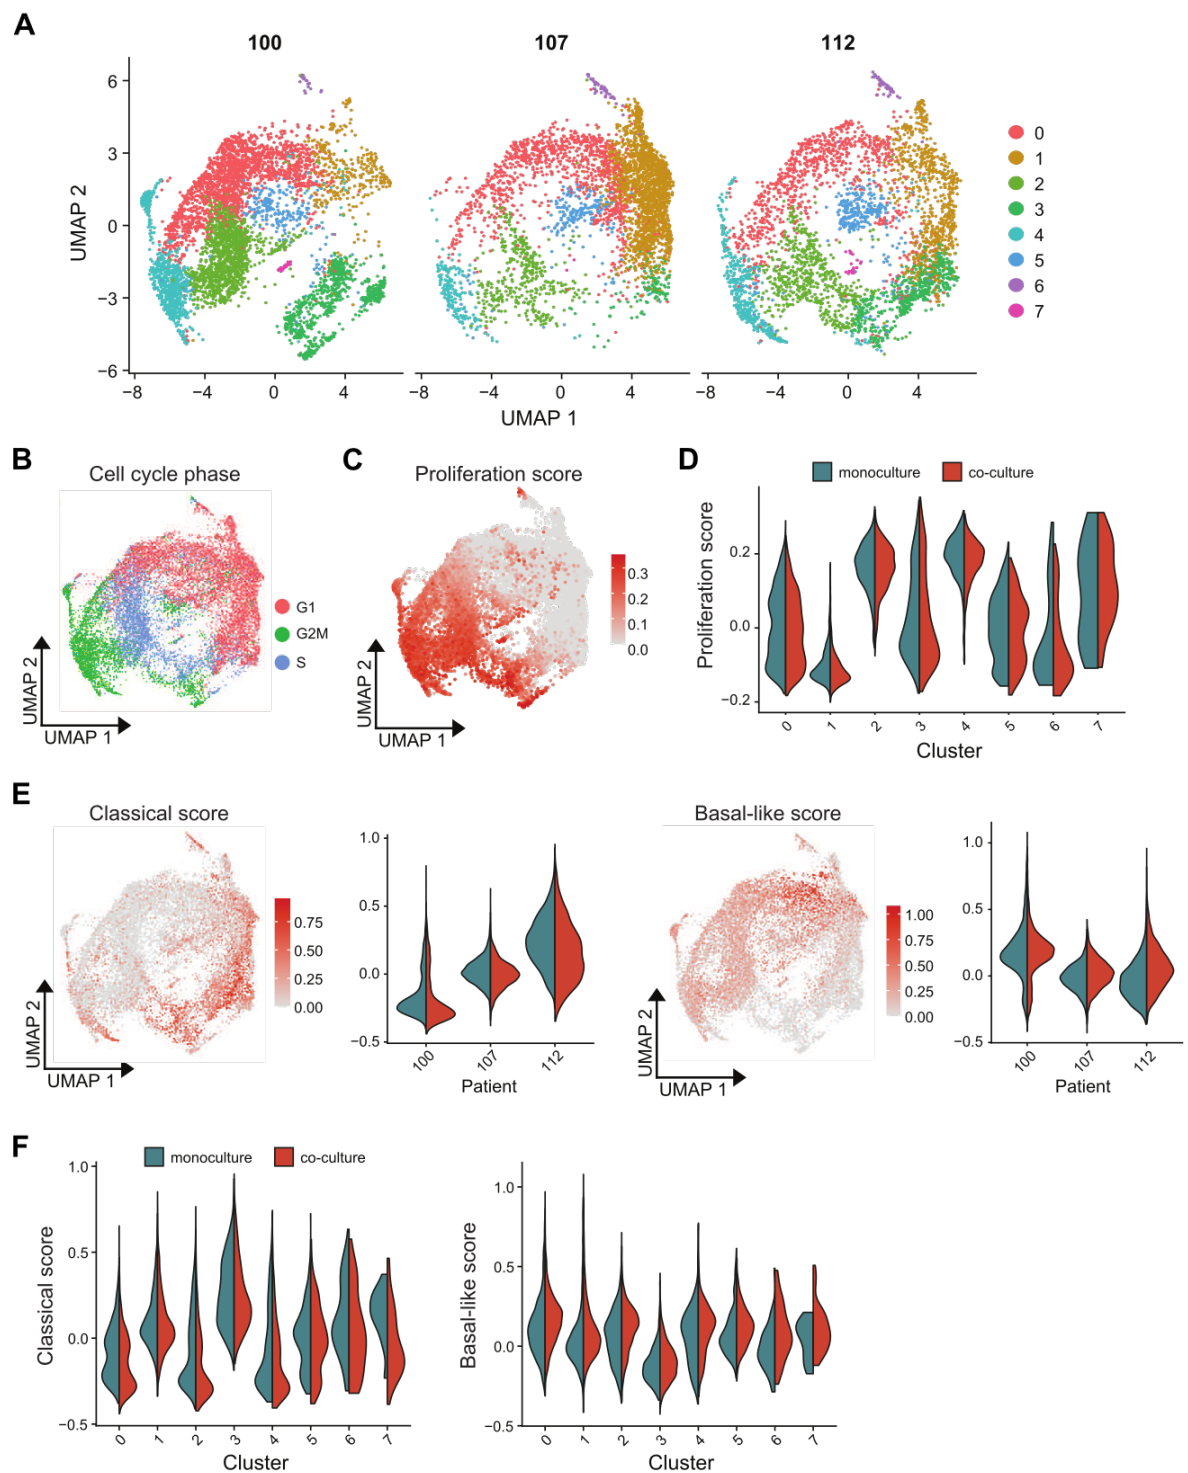

**Supplementary Figure S3. A)** Distribution of PDAC-PDO cells among clusters, split by patient origin.

**B)** Assignment of PDAC-PDO cells to G1, G2/M or S phase based on marker gene expression, using

the same UMAP representation as in Fig. 3A. **C)** Distribution of proliferation scores (gene set:

HALLMARK\_E2F\_TARGETS) across PDAC-PDO cells. **D)** Distribution of proliferation scores by cluster in PDAC-PDO cells in monocultures (blue) and co-cultures (red). **E)** UMAPs: Distribution of classical and basal-like subtype scores across PDAC-PDO cells. Violin plots: Distribution of classical and basal-like subtype scores in monocultures (blue) and co-cultures (red), split by patient origin. **F)** Distribution of classical and basal-like subtype scores across organoid cell clusters in monocultures (blue) and co-cultures (red).
