# Supplementary material for: Patient-specific modeling of stroma-mediated chemoresistance of pancreatic cancer using a three-dimensional organoid-fibroblast co-culture system
Source: PubMed Central journal article supplement (PMC9588250; doi:10.1186/s13046-022-02519-7), 2022-10-22
Supplement: 13046_2022_2519_MOESM2_ESM.pdf [file 13046_2022_2519_MOESM2_ESM.pdf]

### Supplementary Table S1

Additional information of scRNA-seq data: maximum number of counts per gene and maximum fraction of mitochondrial reads.

| <b>Sample ID</b> | <b>Maximum RNA counts per gene</b> | <b>Maximum percentage of mitochondrial reads</b> |
|------------------|------------------------------------|--------------------------------------------------|
| <b>100PO</b>     | 80000                              | 10                                               |
| <b>100CAF</b>    | 60000                              | 15                                               |
| <b>100PO/CAF</b> | 90000                              | 10                                               |
| <b>107PO</b>     | 70000                              | 10                                               |
| <b>107CAF</b>    | 60000                              | 10                                               |
| <b>107PO/CAF</b> | 90000                              | 10                                               |
| <b>112PO</b>     | 100000                             | 10                                               |
| <b>112CAF</b>    | 30000                              | 15                                               |
| <b>112PO/CAF</b> | 100000                             | 10                                               |
